# Supplementary material for: Novel single-source precursors for SiBxCyNz film deposition
Source: Royal Society of Chemistry journal article supplement (doi:10.1039/c7nj01651d), 2017-01-01
Supplement: c7nj01651d1.pdf [file c7nj01651d1.pdf]

## Supporting Information

### Novel Single-source Precursors for $\text{SiB}_x\text{C}_y\text{N}_z$ Film Deposition

Ivan S. Merenkov<sup>a</sup>, Boris A. Gostevskii<sup>b</sup>, Pavel O. Krasnov<sup>a,c</sup>, Tamara V. Basova<sup>a</sup>,  
Yuri M. Zhukov<sup>d</sup>, Igor A. Kasatkin<sup>d</sup>, Sergey V. Sysoev<sup>a</sup>, Victor I. Kosyakov<sup>a</sup>,  
Maksim N. Khomyakov<sup>c</sup>, Marina L. Kosinova<sup>a</sup>

List of considered phases, scheme of reactor, molecular structure of TSABA, experimental tensimetry data, experimental and calculated IR and Raman wavenumbers of the most intense bands of TSABA are available here.

In the process of thermodynamic computation we considered a possibility for the following condensed phases to deposit: Si (l), Si (s),  $\alpha$ -quartz (s),  $\beta$ -quartz (s),  $\alpha$ -tridymite (s),  $\beta$ -tridymite (s),  $\gamma$ -tridymite (s),  $\alpha$ -cristobalite (s),  $\beta$ -cristobalite (s), silica glass (s),  $\text{Si}_3\text{N}_4$  (s),  $\text{H}_2\text{O}$  (l),  $\text{H}_2\text{O}$  (s),  $\alpha$ -SiC (s),  $\beta$ -SiC (s), graphite (s), diamond (s),  $\alpha$ - $\text{B}_2\text{O}_3$  (s),  $\beta$ - $\text{B}_2\text{O}_3$  (s),  $\text{B}_2\text{O}_3$  (l), h-BN (s), c-BN (s), w-BN (s), B (s),  $\text{HBO}_2$  (s),  $\text{HBO}_2$  (l).

The gas phase was assumed to contain the following species:  $\text{Si}_3$ ,  $\text{Si}_2$ ,  $\text{SiO}_2$ ,  $\text{SiO}$ ,  $\text{O}_3$ ,  $\text{O}_2$ ,  $\text{SiN}$ ,  $\text{N}_2\text{O}_4$ ,  $\text{N}_2\text{O}_3$ ,  $\text{N}_2\text{O}$ ,  $\text{NO}$ ,  $\text{NO}_2$ ,  $\text{N}_2$ ,  $\text{SiH}_2$ ,  $\text{SiH}$ ,  $\text{H}_2\text{O}_2$ ,  $\text{H}_2\text{O}$ ,  $\text{HO}_2$ ,  $\text{OH}$ ,  $\text{HNO}_2$ ,  $\text{HNO}$ ,  $\text{HN}_3$ ,  $\text{N}_2\text{H}_2$ ,  $\text{H}_3\text{N}$ ,  $\text{H}_2\text{N}$ ,  $\text{HN}$ ,  $\text{H}_2$ ,  $\text{SiC}_2$ ,  $\text{Si}_2\text{C}$ ,  $\text{C}_2\text{O}$ ,  $\text{CO}$ ,  $\text{CO}_2$ ,  $\text{C}_2\text{N}_2$ ,  $\text{C}_2\text{N}$ ,  $\text{CN}_2$ ,  $\text{CN}$ ,  $\text{CHO}_2$ ,  $\text{CHO}$ ,  $\text{HCN}$ ,  $\text{C}_2\text{H}_6$ ,  $\text{C}_2\text{H}_5$ ,  $\text{C}_2\text{H}_4$ ,  $\text{C}_2\text{H}_3$ ,  $\text{C}_2\text{H}_2$ ,  $\text{C}_2\text{H}$ ,  $\text{CH}_4$ ,  $\text{CH}_3$ ,  $\text{CH}_2$ ,  $\text{CH}$ ,  $\text{B}_2\text{O}_3$ ,  $\text{B}_2\text{O}_2$ ,  $\text{B}_2\text{O}$ ,  $\text{BO}_2$ ,  $\text{BO}$ ,  $\text{BN}$ ,  $\text{BHO}$ ,  $\text{B}_2\text{H}_6$ ,  $\text{BH}_3$ ,  $\text{BH}_2$ ,  $\text{BH}$ ,  $\text{B}_2\text{C}$ ,  $\text{BC}_2$ ,  $\text{BC}$ ,  $\text{B}$ ,  $\text{C}$ ,  $\text{N}$ ,  $\text{H}$ ,  $\text{O}$ ,  $\text{Si}$ .

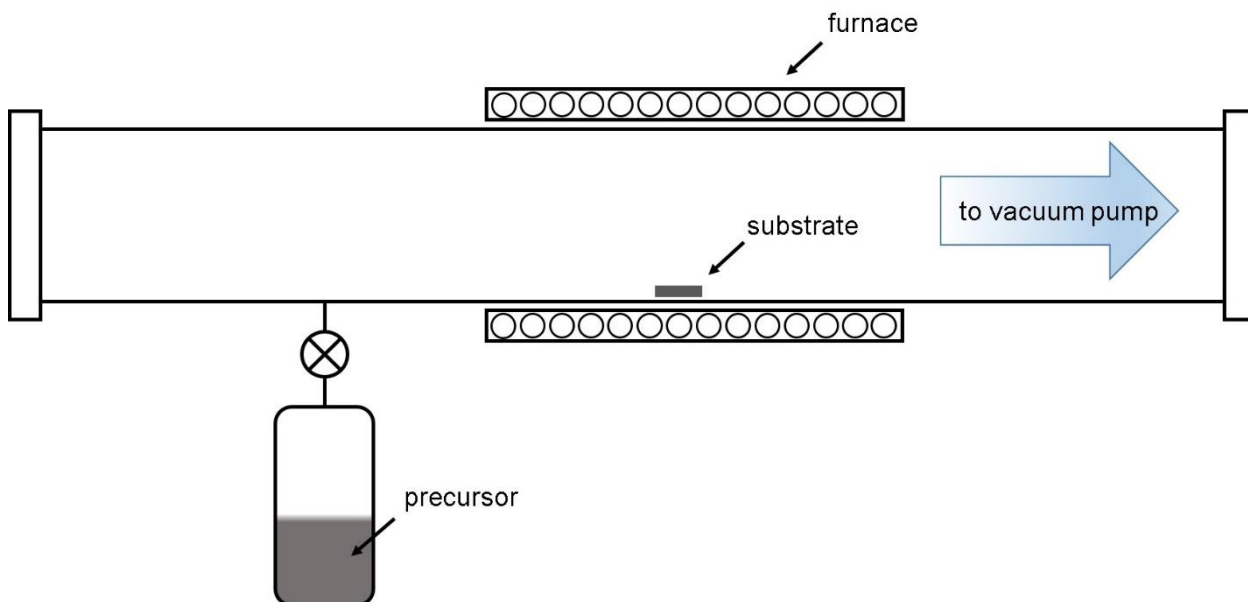

Figure S1. Scheme of reactor

Table S1. Experimental tensimetry data of HC≡CB[N(SiMe<sub>3</sub>)<sub>2</sub>]<sub>2</sub>

| Series |         | Temperature, K | Saturated vapor pressure, Pa |
|--------|---------|----------------|------------------------------|
| I      | heating | 340.3          | 56                           |
|        |         | 350.0          | 73                           |
|        |         | 369.5          | 197                          |
|        |         | 379.4          | 294                          |
|        |         | 389.4          | 442                          |
|        |         | 398.9          | 688                          |
|        |         | 408.8          | 1004                         |
|        |         | 419.8          | 1559                         |
|        | cooling | 408.8          | 1025                         |
|        |         | 398.9          | 698                          |
| 389.1  |         | 430            |                              |
| 379.4  |         | 321            |                              |
| II     | heating | 399.0          | 762                          |
|        |         | 409.0          | 1129                         |
|        |         | 419.5          | 1458                         |
|        |         | 429.6          | 2172                         |
|        |         | 439.2          | 3103                         |
|        | cooling | 429.7          | 2233                         |
|        |         | 409.3          | 1044                         |
|        |         |                |                              |
| III    | heating | 429.4          | 2217                         |
|        |         | 439.2          | 3183                         |
|        |         | 449.4          | 4304                         |
|        |         | 459.3          | 5968                         |
|        |         | 469.0          | 8088                         |
|        | cooling | 459.6          | 6023                         |
|        |         | 449.4          | 4384                         |
|        |         |                |                              |

Table S2. Experimental tensimetry data of MeB[N(SiMe<sub>3</sub>)<sub>2</sub>]<sub>2</sub>

| Series |         | Temperature, K | Saturated vapor pressure, Pa |
|--------|---------|----------------|------------------------------|
| I      | heating | 329.4          | 129                          |
|        |         | 348.9          | 297                          |
|        |         | 368.5          | 713                          |
|        | cooling | 349.2          | 282                          |
|        |         | 329.5          | 111                          |
| II     | heating | 345.7          | 270                          |
|        |         | 365.5          | 704                          |
|        |         | 388.2          | 1386                         |
|        |         | 398.1          | 2074                         |
|        |         | 408.2          | 2943                         |
|        | cooling | 398.2          | 2013                         |
|        |         | 388.5          | 1475                         |
|        | 378.8   | 1101           |                              |
| III    | heating | 329.5          | 95                           |

|  |         |       |      |
|--|---------|-------|------|
|  |         | 349.2 | 357  |
|  |         | 368.7 | 767  |
|  |         | 398.1 | 2065 |
|  |         | 418.9 | 4044 |
|  |         | 428.8 | 5570 |
|  | cooling | 419.5 | 4274 |
|  |         | 400.8 | 2222 |

Table S3. Experimental tensimetry data of  $\text{Me}_3\text{SiC}\equiv\text{CB}[\text{N}(\text{SiMe}_3)_2]_2$

| Series |         | Temperature, K | Saturated vapor pressure, Pa |
|--------|---------|----------------|------------------------------|
| I      | heating | 300.5          | 135                          |
|        |         | 310.2          | 176                          |
|        |         | 320.3          | 219                          |
|        |         | 330.2          | 352                          |
|        |         | 349.3          | 665                          |
|        |         | 368.8          | 1201                         |
|        |         | 389.5          | 2145                         |
| II     | heating | 310.4          | 179                          |
|        |         | 321.2          | 275                          |
|        |         | 330.7          | 337                          |
|        |         | 350.3          | 784                          |
|        |         | 370.0          | 1275                         |
|        |         | 389.5          | 2136                         |
|        |         | 399.4          | 2808                         |
|        |         | 409.5          | 3566                         |
|        | 419.8   | 4526           |                              |
|        | cooling | 410.0          | 3384                         |
|        | 399.4   | 3041           |                              |
| III    | heating | 310.2          | 157                          |
|        |         | 329.9          | 353                          |
|        |         | 398.3          | 2790                         |
|        |         | 419.2          | 4456                         |
|        |         | 429.1          | 5526                         |
|        |         | 439.6          | 6935                         |
|        |         | 449.6          | 8742                         |
|        | cooling | 439.9          | 6866                         |
|        |         | 430.5          | 5780                         |
|        |         | 419.8          | 4749                         |
| IV     | heating | 399.0          | 2849                         |
|        |         | 419.0          | 4598                         |
|        |         | 429.0          | 5682                         |
|        |         | 438.9          | 6917                         |
|        | cooling | 430.1          | 5654                         |
|        |         | 420.2          | 4642                         |
|        | 398.8   | 2825           |                              |

Table S4. Standard thermodynamic characteristics of compounds (1) and (2).

| Compound | $\ln P/P^0 = A - B/T$ |      | $\Delta H(T^*)$<br>$\text{kJ} \times \text{mol}^{-1}$ | $\Delta S^\circ(T^*)$<br>$\text{J} \times \text{mol}^{-1}$ | Temperature<br>range, K |
|----------|-----------------------|------|-------------------------------------------------------|------------------------------------------------------------|-------------------------|
|          | A                     | B    |                                                       |                                                            |                         |
| (1)      | 9.85                  | 5470 | $46.0 \pm 0.7$                                        | $81.2 \pm 1.8$                                             | 309 - 429               |
| (2)      | 11.45                 | 6557 | $54.5 \pm 0.5$                                        | $94.9 \pm 1.2$                                             | 340 - 470               |
| (3)      | 6.35                  | 3966 | $33.0 \pm 0.4$                                        | $52.8 \pm 0.8$                                             | 300 - 450               |

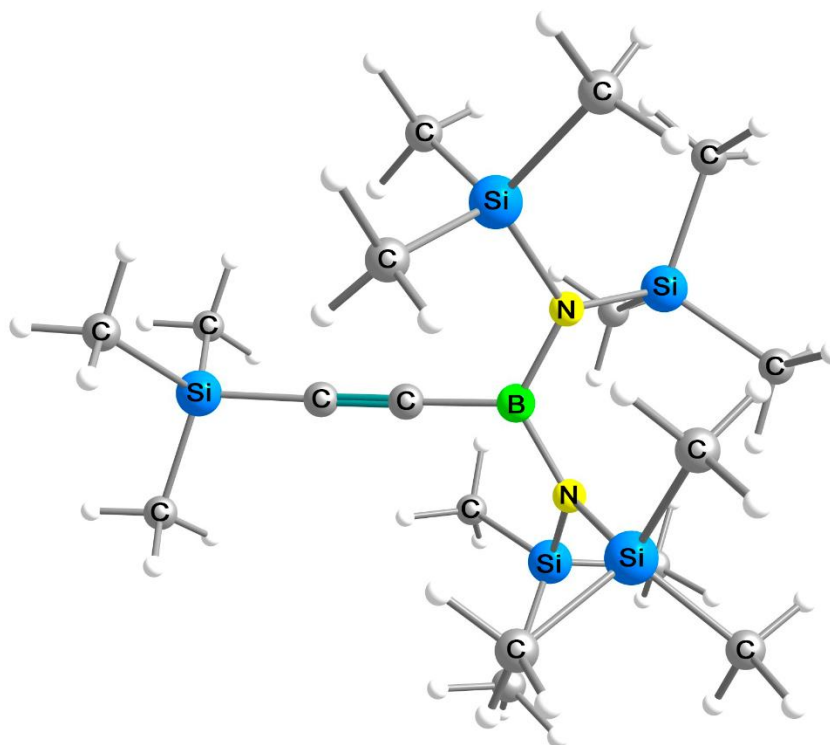

Figure S2. Molecular structure of TSABA

Table S5. NMR spectroscopic data of the compounds (1) and (2).

| Nucleus          | Compound (1)<br>$\delta$ , ppm | Compound (2)<br>$\delta$ , ppm | Assignment                 |
|------------------|--------------------------------|--------------------------------|----------------------------|
| $^1\text{H}$     | 0.27 (36H)                     | 0.21 (36H)                     | $(\text{CH}_3)_3\text{Si}$ |
|                  |                                | 0.56 (3H)                      | $\text{BCH}_3$             |
|                  | 2.81 (1H)                      |                                | $\text{HC}\equiv$          |
| $^{13}\text{C}$  |                                | 3.38                           | $\text{H}_3\text{CB}$      |
|                  | 4.32                           | 4.74                           | $\text{H}_3\text{CSi}$     |
|                  | 93.58                          |                                | $\text{HC}\equiv$          |
|                  | 94.64                          |                                | $\text{BC}\equiv$          |
| $^{29}\text{Si}$ | 2.85                           | 0.51                           | $\text{NSiC}$              |
| $^{11}\text{B}$  | 32.07                          | 49.20                          | $\text{CBN}$               |

Table S6. Elemental analysis data of the compounds (1) and (2).

| Element | Compound (1) |              | Compound (2) |              |
|---------|--------------|--------------|--------------|--------------|
|         | Calculated   | Experimental | Calculated   | Experimental |
| C       | 47.15        | 47.31        | 45.05        | 45.08        |
| H       | 10.46        | 10.37        | 11.34        | 11.28        |
| N       | 7.85         | 7.65         | 8.08         | 8.12         |
| Si      | 31.50        | 31.76        | 32.41        | 32.37        |
| B       | 3.03         | 3.10         | 3.12         | 3.15         |

Based on the elemental analysis and NMR spectroscopy, the purity of the obtained precursors were more 99.6%.

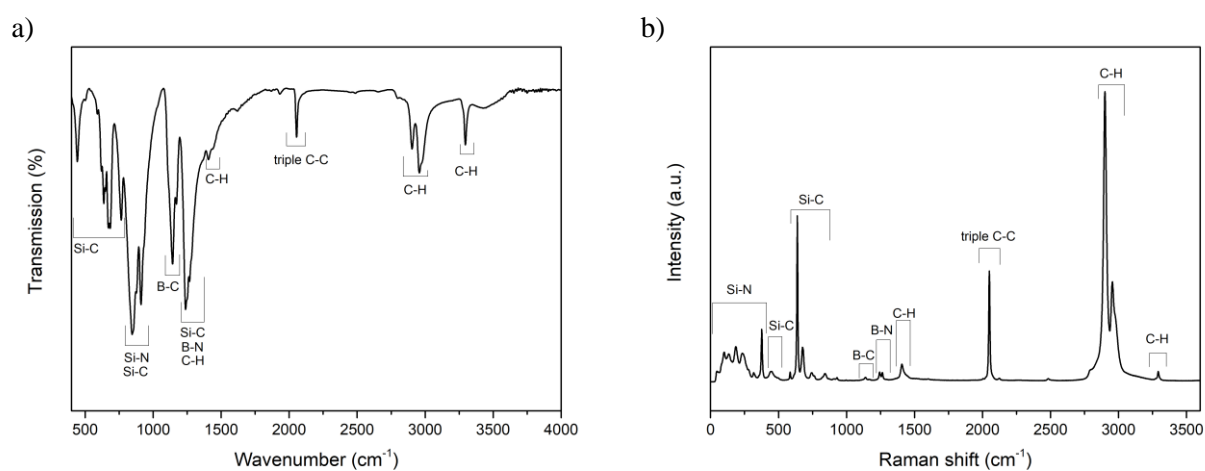

**Figure S3.** (a) FTIR and (b) Raman spectra of  $\text{HC}\equiv\text{CB}[\text{N}(\text{SiMe}_3)_2]_2$

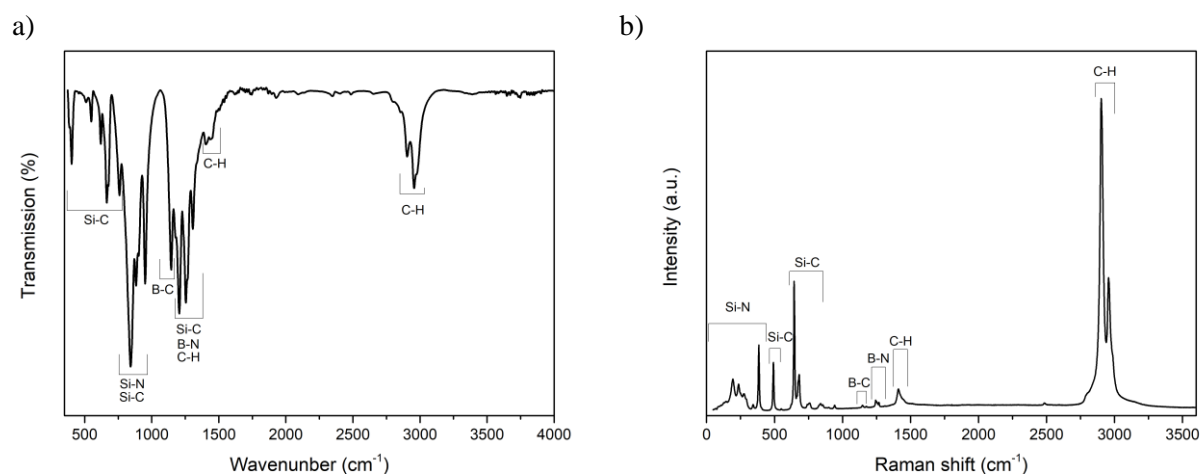

**Figure S4.** (a) FTIR and (b) Raman spectra of  $\text{MeB}[\text{N}(\text{SiMe}_3)_2]_2$

Table S7. Experimental and calculated IR wavenumbers of the most intense bands of TSABA

| Experimental IR wavenumber, cm <sup>-1</sup> | Calculated IR wavenumber, cm <sup>-1</sup> | Calculated IR intensity, a.u. | Assignment                                                                                                                            |
|----------------------------------------------|--------------------------------------------|-------------------------------|---------------------------------------------------------------------------------------------------------------------------------------|
| 2959 s                                       | 3070 - 3109                                | 255.4                         | $\nu(\text{C-H})$                                                                                                                     |
| 2901 s                                       | 2959 - 3068                                | 98.9                          | $\nu(\text{C-H})$                                                                                                                     |
| 2102 w                                       | 2149                                       | 0.2                           | $\nu(\text{C}\equiv\text{C}), \delta(\text{N-B-N})$                                                                                   |
| 1408 m                                       | 1412                                       | 8.9                           | $\delta(\text{H-C-H})$                                                                                                                |
| 1252 s                                       | 1250                                       | 799.6                         | $\nu(\text{B-N}), \delta(\text{C-B-N}), \delta(\text{H-C-H}), \delta(\text{Si-N-Si})$                                                 |
|                                              | 1207 - 1230                                | 350.4                         | $\delta(\text{H-C-H}), \nu(\text{Si-C in Si-CH}_3)$                                                                                   |
| 1175 s                                       | 1176                                       | 583.3                         | $\nu(\text{C-B}), \nu(\text{B-N}), \nu(\text{Si-C}\equiv), \nu(\text{Si-N}), \delta(\text{Si-N-B})$                                   |
| 943 m                                        | 956                                        | 75.2                          | $\delta(\text{N-B-N}), \nu(\text{C-B}), \nu(\text{Si-C}\equiv), \delta(\text{Si-C-H}), \delta(\text{Si-N-Si}), \delta(\text{Si-N-B})$ |
| 910 s                                        | 906                                        | 445.0                         | $\nu(\text{N-Si}), \delta(\text{Si-N-B}), \nu(\text{C-B}), \nu(\text{Si-C}\equiv),$                                                   |
| 889 s                                        | 884                                        | 153.8                         | $\nu(\text{Si-N}), \delta(\text{N-B-N}), \nu(\text{C-B}), \delta(\text{Si-C-H}), \nu(\text{Si-C}), \delta(\text{Si-N-B})$             |
| 849 s                                        | 843                                        | 602.0                         | $\delta(\text{Si-C-H}), \nu(\text{Si-C in Si-CH}_3)$                                                                                  |
|                                              | 840                                        | 485.1                         | $\delta(\text{Si-C-H}), \nu(\text{Si-C}\equiv)$                                                                                       |
| 762 s                                        | 747                                        | 32.2                          | $\delta(\text{Si-C-H}), \nu(\text{Si-C in Si-CH}_3)$                                                                                  |
|                                              | 745                                        | 33.8                          |                                                                                                                                       |
| 667 s                                        | 670                                        | 10.4                          | $\nu(\text{Si-C}), \delta(\text{Si-C-H})$                                                                                             |
|                                              | 655                                        | 15.3                          | $\delta(\text{Si-C-H}), \nu(\text{Si-C in Si-CH}_3)$                                                                                  |
|                                              | 649                                        | 17.3                          | $\nu(\text{Si-C}), \delta(\text{Si-C-H})$                                                                                             |
|                                              | 646                                        | 16.0                          | $\delta(\text{Si-C-H}), \delta(\text{N-B-C}), \delta(\text{C}\equiv\text{C-B})$                                                       |
| 619 m                                        | 615                                        | 4.3                           | $\nu(\text{Si-C}), \nu(\text{B-C})$                                                                                                   |
| 592 w                                        | 597                                        | 3.8                           | $\nu(\text{Si-C in Si-CH}_3), \delta(\text{C}\equiv\text{C-B}), \delta(\text{Si-N-Si})$                                               |
| 577 w                                        | 579                                        | 0.8                           | $\nu(\text{Si-C in Si-CH}_3), \delta(\text{C}\equiv\text{C-B}), \delta(\text{N-B-C})$                                                 |
| 465 m                                        | 463                                        | 18.7                          | $\delta(\text{C}\equiv\text{C-B}), \delta(\text{C}\equiv\text{C-Si}), \delta(\text{Si-N-B})$                                          |
| 388 m                                        | 393                                        | 27.6                          | $\delta(\text{Si-N-B}), \delta(\text{C-Si-C})$                                                                                        |
|                                              | 388                                        | 5.5                           | $\delta(\text{C}\equiv\text{C-Si}), \delta(\text{Si-C-H})$                                                                            |

Table S8. Experimental and calculated Raman wavenumbers of the most intense bands of TSABA

| Experimental Raman wavenumber, cm <sup>-1</sup> | Calculated Raman wavenumber, cm <sup>-1</sup> | Calculated Raman intensity, a.u. | Assignment                                                                            |
|-------------------------------------------------|-----------------------------------------------|----------------------------------|---------------------------------------------------------------------------------------|
| 2963 m                                          | 3051 - 3109                                   | 2248.8                           | $\nu(\text{C-H})$                                                                     |
| 2901 s                                          | 2959 - 2972                                   | 2411.4                           | $\nu(\text{C-H})$                                                                     |
| 2125 s                                          | 2149                                          | 998.7                            | $\nu(\text{C}\equiv\text{C}), \delta(\text{N-B-N})$                                   |
| 1411 w                                          | 1370 - 1412                                   | 304.1                            | $\delta(\text{H-C-H})$                                                                |
| 1261w                                           | 1250                                          | 2.7                              | $\nu(\text{B-N}), \delta(\text{C-B-N}), \delta(\text{H-C-H}), \delta(\text{Si-N-Si})$ |
| 1252 w                                          | 1207 - 1230                                   | 24.4                             | $\delta(\text{H-C-H}), \nu(\text{Si-C in Si-CH}_3)$                                   |

|        |      |      |                                                                                                          |
|--------|------|------|----------------------------------------------------------------------------------------------------------|
| 1175 w | 1176 | 46.3 | $\nu(\text{C-B}), \nu(\text{B-N}), \nu(\text{Si-C}\equiv), \nu(\text{Si-N}),$<br>$\delta(\text{Si-N-B})$ |
| 843 w  | 840  | 3.2  | $\delta(\text{Si-C-H}), \nu(\text{Si-C}\equiv)$                                                          |
|        | 834  | 7.8  | $\delta(\text{Si-C-H}), \nu(\text{Si-C})$                                                                |
| 761 w  | 740  | 3.8  | $\delta(\text{Si-C-H}), \nu(\text{Si-C in Si-CH}_3)$                                                     |
|        | 730  | 3.4  | $\delta(\text{Si-C-H})$                                                                                  |
| 683 m  | 677  | 10.3 | $\delta(\text{Si-C-H}), \nu(\text{Si-C})$                                                                |
| 638 s  | 649  | 3.2  | $\nu(\text{Si-C}), \delta(\text{Si-C-H})$                                                                |
| 593 w  | 597  | 2.4  | $\nu(\text{Si-C in Si-CH}_3), \delta(\text{C}\equiv\text{C-B}),$<br>$\delta(\text{Si-N-Si})$             |
| 465 w  | 463  | 4.8  | $\delta(\text{C}\equiv\text{C-B}), \delta(\text{C}\equiv\text{C-Si}), \delta(\text{Si-N-B})$             |
| 381 s  | 393  | 4.2  | $\delta(\text{Si-N-B}), \delta(\text{C-Si-C})$                                                           |
|        | 370  | 5.5  | $\delta(\text{Si-N-Si}), \delta(\text{C}\equiv\text{C-Si}), \delta(\text{Si-C-H})$                       |
|        | 362  | 9.6  | $\delta(\text{Si-N-Si}), \delta(\text{C}\equiv\text{C-B}), \delta(\text{C}\equiv\text{C-Si})$            |
| 192 m  | 187  | 1.5  | $\delta(\text{C-Si-C}), \delta(\text{Si-C-H})$                                                           |
| 108 w  | 110  | 0.9  | $\delta(\text{Si-N-B})$                                                                                  |
